# Supplementary material
Source: HighWire-hosted journal article supplement (https://openheart.bmj.com/content/8/2/e001666)

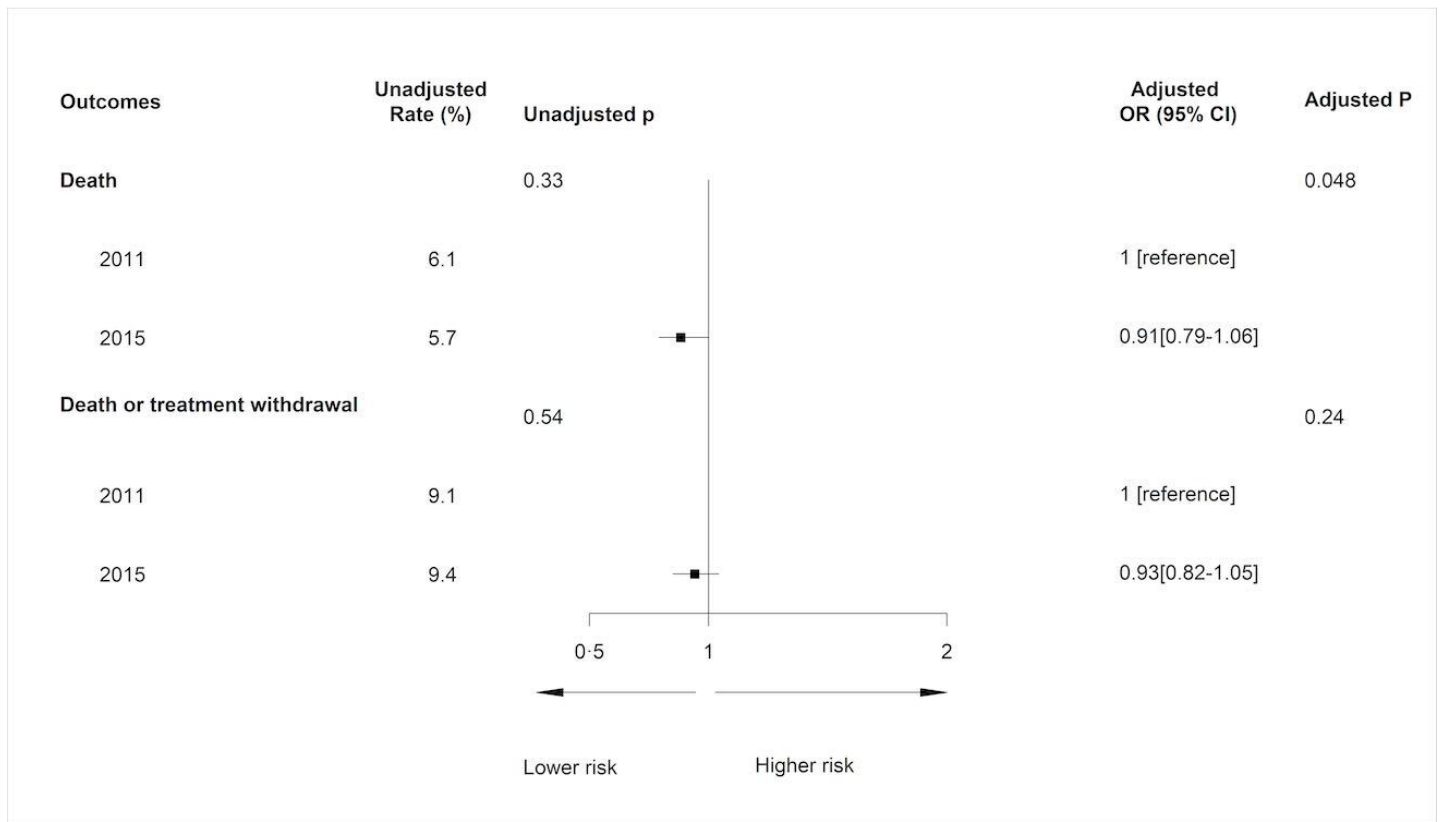

Supplement: inline-supplementary-material-3 [file inline-supplementary-material-3.pdf]
